# Supplementary material for: College Student Conceptions about Changes to Earth and Life over Time
Source: Atypon-hosted journal article supplement (doi:10.1187/cbe.19-01-0008), 2020-08-07
Supplement: combinedsupmats.pdf [file combinedsupmats.pdf]

# Supplemental Material

*CBE—Life Sciences Education*

Jaimes *et al.*



The image to the right represents the Earth TODAY.

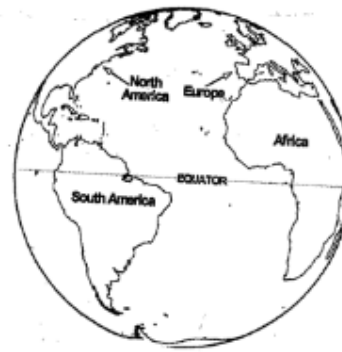

1. Think back in time to when you said the dinosaurs first appeared on Earth. What do you think the Earth and continents looked like then? Do you think the Earth was the same size as it is today, or has it shrunken or expanded? **Choose the appropriate circle below and draw what you think the Earth's continents looked like when dinosaurs first appeared on Earth.**

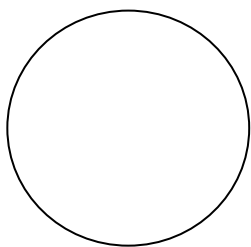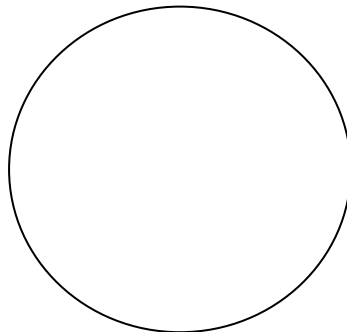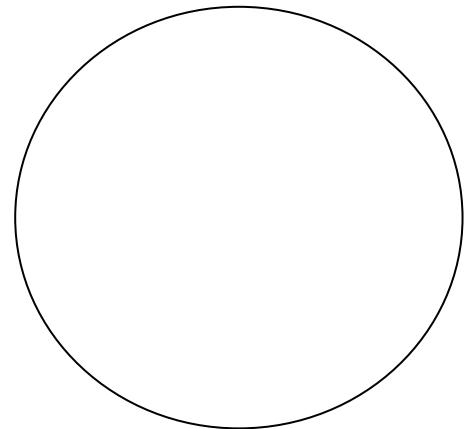

2. Think into the future the same length of time you think passed between the first appearance of dinosaurs and today. What do you think the Earth and continents will look like then? Do you think the Earth will be the same size as it is today, or will it shrink or expand? Choose the appropriate circle below and **draw what you think the Earth's continents will look like in this future.**

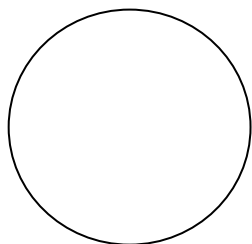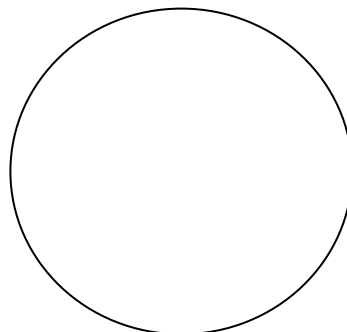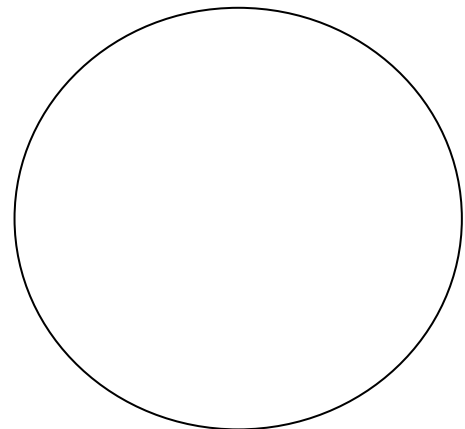

3. Why do you think Earth's size changes or remains the same over time?

4. Why do you think Earth's surface changes or remains the same over time?

Please provide additional information about yourself by answering the questions below.

**Please check all science courses you completed while in high school (grades 9-12):**

CHOOSE ALL THAT APPLY

- Biology
- AP Biology
- Chemistry
- AP Chemistry
- Physics
- AP Physics
- Earth Science
- Other \_\_\_\_\_

**Your AGE:** \_\_\_\_\_

**Your Home U.S. 5-digit ZIP CODE:** \_\_\_\_\_ **OR Your Home Country:** \_\_\_\_\_

**Your GENDER:**  Male  Female  Transgender  Other \_\_\_\_\_

**Do you self-identify as LGBTQIA?**  Yes  No

**Your Ethnicity:**

CHOOSE ALL THAT APPLY

- American Indian/Native American
- Asian/Asian American
- Black/African/African American
- Latino(a)/Hispanic
- Native Hawaiian/Pacific Islander
- White/Caucasian
- Other \_\_\_\_\_

**Do you self-identify as having any of the following disabilities?**

CHOOSE ALL THAT APPLY

- I do not identify as having any disability
- Blind/Visual disability
- Deaf/Hard of hearing/Hearing disability
- Physical/Orthopedic disability
- Learning/Cognitive disability
- Vocal/Speech disability
- Other \_\_\_\_\_

Would you like to tell us anything else about yourself?

THANK YOU FOR PARTICIPATING!
